# Supplementary material
Source: publisher site journal article supplement (https://www.dovepress.com/article/506867)
Supplement: Supplementary file 1 [file get_supplementary_file.php]

**Table S1** The Index Pool of Tuberculosis Healthcare Services Resilience

| **NO.** | **Items** |
| --- | --- |
| 1 | Emergency plan formulation |
| 2 | Stock of diagnostic reagents for TB |
| 3 | Stock of anti-TB drugs |
| 4 | Stock of medical protective masks in TB-designated hospital |
| 5 | Number of institutions capable of tuberculosis diagnosis and treatment |
| 6 | Number of institutions within the jurisdiction that can provide inpatient services for tuberculosis |
| 7 | Number of tuberculosis beds per 1,000 people |
| 8 | Whether the TB-designated hospital provides teleconsultation services |
| 9 | Proportion of township health centers/community health service centers that can normally utilize DR (CT) imaging equipment |
| 10 | Amount of emergency reserve funds |
| 11 | Actual per capita funding for TB services providing |
| 12 | Actual per capita funding for TB patients |
| 13 | Proportion of serviced population outfitted with TB control personnel |
| 14 | Proportion of serviced population outfitted with TB doctors |
| 15 | Proportion of serviced population outfitted with TB lab staffs |
| 16 | Proportion of serviced population outfitted with tuberculosis prevention and control personnel at the grassroots level |
| 17 | Timeliness of health-seeking for TB patients |
| 18 | Referral proportion of TB patients or suspected TB patients reported by non-TB-designated hospital |
| 19 | The proportion of patients who reached TB-designated hospital among those referred by non-TB-designated hospital |
| 20 | The proportion of patients who reached TB-designated hospitals among those who have been traced |
| 21 | Proportion of TB molecular biological test using among patients first contacted TB-designated hospital |
| 22 | Detection rate of tuberculosis among patients initially visiting TB-designated hospital |
| 23 | Number of institutions can provide tuberculosis bacteria testing |
| 24 | Timeliness of diagnosis for TB patients |
| 25 | The percentage of screening for drug resistance among bacteriologically positive TB patients |
| 26 | Screening rate of close contacts of TB patients with positive etiology |
| 27 | The proportion of TB patients who are being treated among diagnosed patients |
| 28 | Screening rate for suspected tuberculosis symptoms among elderly people aged 65 and above |
| 29 | Chest X-ray examination rate for elderly people with suspected tuberculosis symptoms |
| 30 | Tuberculosis screening rate among diabetics |
| 31 | Tuberculosis screening rate among HIV positive population |
| 32 | The proportion of TB patients detected by active case-finding |
| 33 | The inclusion rate of rifampicin-resistant TB patients into treatment |
| 34 | Timeliness of treatment for diagnosed TB patients |
| 35 | Proportion of sputum reexamination in TB patients at the end of 2 months after treatment |
| 36 | Proportion of sputum reexamination in TB patients prior a month when treatment over |
| 37 | Proportion of sputum examination in TB patients at the end of the treatment course |
| 38 | The timely treatment rate for TB patients experiencing adverse drug reactions |
| 39 | Shortage rate of anti-tuberculosis drugs |
| 40 | Proportion of patients whose treatment was interrupted due to drug shortages caused by PHEs |
| 41 | Duration of tuberculosis clinic closure due to the PHEs |
| 42 | Duration of tuberculosis ward closure due to the PHEs |
| 43 | Proportion of TB patients under management in primary health care institutions |
| 44 | Percentage of TB patient under management |
| 45 | Percentage of TB patient under standard management |
| 46 | Successful transfer rate of cross-regional tuberculosis patients |
| 47 | Proportion of TB patients receiving nutritional/transportation support |
| 48 | Proportion of TB patients who received at least one psychological support |
| 49 | Proportion of patients contacted TB-designated hospital for TB appraisal to the serviced population |
| 50 | The percentage of TB patients with bacteriological positive result |
| 51 | Proportion of TB patients who discontinued treatment |
| 52 | Proportion of TB patients taking drugs regularly during treatment |
| 53 | Reported incidence of TB |
| 54 | Cure rate of TB patients |
| 55 | Mortality of TB patients |

**Abbreviation:** TB, tuberculosis; PHEs, public health emergencies

**Table S2** The Initial Resilience Assessment Index System for Tuberculosis Healthcare Services

| **First-grade (3 items)** | **Second-grade (9 items)** | **Third-grade (34 items)** |
| --- | --- | --- |
| 1.Service guarantee | 1.1 Response preparation | 1.1.1 Emergency plan formulation |
| 1.1.2 Stock of diagnostic reagents for TB |
| 1.1.3 Stock of anti-TB drugs |
| 1.1.4 Stock of medical protective masks in TB-designated hospital |
| 1.1.5 Amount of emergency reserve funds |
| 1.2 Financial support | 1.2.1 Actual per capita funding for TB services providing |
| 1.2.2 Actual per capita funding for TB patients |
| 1.3 Human resources | 1.3.1 Number of TB control staff per 100,000 serviced population |
| 1.3.2 Number of TB doctors per 100,000 serviced population |
| 1.3.3 Number of TB laboratory personnel per 100,000 serviced population |
| 2.Service provision and utilization | 2.1 Patients diagnosis | 2.1.1 Timeliness of health-seeking for TB patients |
| 2.1.2 The referral proportion of PTB patients or suspected PTB patients reported by non-TB-designated hospital |
| 2.1.3 The proportion of patients who reached TB-designated hospital among those referred by non-TB-designated hospital |
| 2.1.4 The proportion of patients who reached TB-designated hospitals among those who have been traced |
| 2.1.5The proportion of patients who undergo molecular biological testing upon their first visit to TB-designated hospitals |
| 2.1.6 Timeliness of diagnosis for TB patients |
| 2.1.7 The proportion of drug resistance screening among bacteriologically positive TB patients |
| 2.2 Patients treatment | 2.2.1The proportion of confirmed TB patients who are enrolled in anti-TB treatment |
| 2.2.2 Timeliness of treatment for diagnosed TB patients |
| 2.2.3 Proportion of sputum reexamination in TB patients at the end of 2 months after treatment |
| 2.2.4 Proportion of sputum reexamination in TB patients prior a month when treatment over |
| 2.2.5 Proportion of sputum reexamination in TB patients at the end of the treatment course |
| 2.3 Patients management | 2.3.1 The proportion of TB patients under management in primary health care institutions |
| 2.3.2 Percentage of TB patient under management |
| 2.3.3 Percentage of TB patient under standard management |
| 2.4 Patients care | 2.4.1 Proportion of TB patients receiving nutritional/transportation support |
| 2.4.2 Proportion of TB patients who received at least one psychological support |
| 3.Service outcomes and effects | 3.1 Service outcomes | 3.1.1 The proportion of patients contacted TB-designated hospital for TB appraisal to the serviced population |
| 3.1.2 The proportion of TB patients with positive bacteriological result |
| 3.1.3 The proportion of TB patients who discontinued treatment |
| 3.1.4 The proportion of TB patients taking drugs regularly during treatment |
| 3.2 Service effects | 3.2.1 Reported incidence of TB |
| 3.2.2 Cure rate of TB patients |
| 3.2.3 Mortality of TB patients |

**Abbreviations**: TB, tuberculosis

| **Table S3** Comparison of Indicator Importance Scores Between Male and Female Experts in Round 1 Delphi Consultation | | | | |
| --- | --- | --- | --- | --- |
| **Indicators** | **Mean score** | | **t** | **P** |
| **Male** | **Female** |
| 1 Service guarantee | 8.076 | 8.084 | -0.030 | 0.976 |
| 2 Service provision and utilization | 8.196 | 8.205 | -0.034 | 0.974 |
| 3 Service outcomes and effects | 8.085 | 8.201 | -0.417 | 0.680 |
| 1.1 Response preparation | 8.005 | 7.730 | 0.561 | 0.580 |
| 1.2 Financial support | 8.111 | 8.225 | -0.428 | 0.673 |
| 1.3 Human resources | 8.210 | 8.029 | 0.686 | 0.499 |
| 2.1 Patients diagnosis | 8.349 | 8.126 | 0.863 | 0.397 |
| 2.2 Patients treatment | 8.307 | 8.252 | 0.214 | 0.832 |
| 2.3 Patients management | 8.348 | 7.948 | 1.095 | 0.285 |
| 2.4 Patients care | 7.562 | 7.321 | 0.468 | 0.644 |
| 3.1 Service outcomes | 8.023 | 8.297 | -1.046 | 0.306 |
| 3.2 Service effects | 8.102 | 8.208 | -0.410 | 0.685 |
| 1.1.1 Emergency plan formulation | 8.247 | 7.775 | 1.066 | 0.297 |
| 1.1.2 Stock of diagnostic reagents for TB | 7.840 | 8.172 | -0.970 | 0.342 |
| 1.1.3 Stock of anti-TB drugs | 8.169 | 8.383 | -0.834 | 0.412 |
| 1.1.4 Stock of medical protective masks in TB-designated hospital | 8.053 | 8.209 | -0.439 | 0.665 |
| 1.1.5 Amount of emergency reserve funds | 7.617 | 7.045 | 1.192 | 0.245 |
| 1.2.1 Actual per capita funding for TB services providing | 8.266 | 7.783 | 1.639 | 0.114 |
| 1.2.2 Actual per capita funding for TB patients | 8.015 | 8.063 | -0.173 | 0.864 |
| 1.3.1 Number of TB control staff per 100,000 serviced population | 8.040 | 7.935 | 0.356 | 0.725 |
| 1.3.2 Number of TB doctors per 100,000 serviced population | 8.088 | 7.940 | 0.516 | 0.611 |
| 1.3.3 Number of TB laboratory personnel per 100,000 serviced population | 7.853 | 7.805 | 0.136 | 0.893 |
| 2.1.1 Timeliness of health-seeking for TB patients | 7.773 | 7.355 | 0.919 | 0.367 |
| 2.1.2 The referral proportion of PTB patients or suspected PTB patients reported by non-TB-designated hospital | 7.761 | 7.801 | -0.097 | 0.924 |
| 2.1.3 The proportion of patients who reached TB-designated hospital among those referred by non-TB-designated hospital | 7.846 | 7.771 | 0.221 | 0.827 |
| 2.1.4 The proportion of patients who reached TB-designated hospitals among those who have been traced | 7.948 | 7.736 | 0.748 | 0.461 |
| 2.1.5The proportion of patients who undergo molecular biological testing upon their first visit to TB-designated hospitals | 7.849 | 8.290 | -1.306 | 0.204 |
| 2.1.6 Timeliness of diagnosis for TB patients | 8.248 | 7.987 | 0.626 | 0.537 |
| 2.1.7 The proportion of drug resistance screening among bacteriologically positive TB patients | 7.790 | 8.246 | -1.339 | 0.193 |
| 2.2.1The proportion of confirmed TB patients who are enrolled in anti-TB treatment | 8.386 | 8.622 | -0.993 | 0.331 |
| 2.2.2 Timeliness of treatment for diagnosed TB patients | 8.234 | 8.334 | -0.220 | 0.828 |
| 2.2.3 Proportion of sputum reexamination in TB patients at the end of 2 months after treatment | 8.247 | 8.423 | -0.650 | 0.522 |
| 2.2.4 Proportion of sputum reexamination in TB patients prior a month when treatment over | 7.871 | 8.054 | -0.445 | 0.660 |
| 2.2.5 Proportion of sputum reexamination in TB patients at the end of the treatment course | 8.029 | 8.140 | -0.312 | 0.758 |
| 2.3.1 The proportion of TB patients under management in primary health care institutions | 8.019 | 7.611 | 0.758 | 0.456 |
| 2.3.2 Percentage of TB patient under management | 8.091 | 7.644 | 0.818 | 0.421 |
| 2.3.3 Percentage of TB patient under standard management | 8.372 | 7.469 | 1.658 | 0.110 |
| 2.4.1 Proportion of TB patients receiving nutritional/transportation support | 7.286 | 7.151 | 0.218 | 0.829 |
| 2.4.2 Proportion of TB patients who received at least one psychological support | 6.948 | 6.818 | 0.209 | 0.836 |
| 3.1.1 The proportion of patients contacted TB-designated hospital for TB appraisal to the serviced population | 7.861 | 7.490 | 0.758 | 0.456 |
| 3.1.2 The proportion of TB patients with positive bacteriological result | 7.947 | 8.018 | -0.288 | 0.776 |
| 3.1.3 The proportion of TB patients who discontinued treatment | 8.443 | 8.013 | 1.012 | 0.322 |
| 3.1.4 The proportion of TB patients taking drugs regularly during treatment | 7.985 | 7.773 | 0.412 | 0.684 |
| 3.2.1 Reported incidence of TB | 8.510 | 8.443 | 0.279 | 0.783 |
| 3.2.2 Cure rate of TB patients | 8.109 | 8.451 | -1.299 | 0.206 |
| 3.2.3 Mortality of TB patients | 8.023 | 8.252 | -0.640 | 0.528 |
| **Abbreviations**: TB, tuberculosis |  |  |  |  |

| **Table S4** Comparison of Indicator Importance Scores Between Male and Female Experts in Round 2 Delphi Consultation | | | | |
| --- | --- | --- | --- | --- |
| **Indicators** | **Mean Score** | | **t** | **P** |
| **Male** | **Female** |
| 1 Service guarantee | 7.968 | 8.124 | -0.941 | 0.357 |
| 2 Service provision and utilization | 8.151 | 8.156 | -0.030 | 0.977 |
| 3 Service outcomes and effects | 8.065 | 8.099 | -0.243 | 0.810 |
| 1.1 Response preparation | 7.571 | 7.842 | -0.982 | 0.337 |
| 1.2 Financial support | 7.858 | 8.168 | -1.419 | 0.169 |
| 1.3 Human resources | 8.001 | 8.093 | -0.519 | 0.608 |
| 2.1 Patients diagnosis | 8.196 | 8.191 | 0.031 | 0.975 |
| 2.2 Patients treatment | 8.206 | 8.372 | -1.255 | 0.222 |
| 2.3 Patients management | 8.164 | 8.071 | 0.489 | 0.630 |
| 2.4 Patients care | 7.524 | 7.709 | -0.646 | 0.524 |
| 3.1 Service outcomes | 8.123 | 8.109 | 0.076 | 0.940 |
| 3.2 Service effects | 7.987 | 7.982 | 0.029 | 0.977 |
| 1.1.1 Emergency plan formulation | 8.239 | 7.855 | 1.860 | 0.076 |
| 1.1.2 Stock of diagnostic reagents for TB | 7.940 | 7.889 | 0.209 | 0.836 |
| 1.1.3 Stock of anti-TB drugs | 8.108 | 8.072 | 0.169 | 0.867 |
| 1.1.4 Stock of medical protective masks in TB-designated hospital | 7.935 | 7.902 | 0.127 | 0.900 |
| 1.1.5 Amount of emergency reserve funds | 7.216 | 7.375 | -0.255 | 0.801 |
| 1.1.6 Number of institutions with the capacity and authority to treat tuberculosis | 7.390 | 8.081 | -2.077 | 0.049 |
| 1.2.1 Actual per capita funding for TB services providing | 8.126 | 7.850 | 1.681 | 0.106 |
| 1.2.2 Actual per capita funding for TB patients | 7.880 | 7.868 | 0.080 | 0.937 |
| 1.2.3 The actual additional emergency funds implemented for TB care services | 7.685 | 7.839 | -0.707 | 0.487 |
| 1.3.1 Number of TB control staff per 100,000 serviced population | 7.968 | 7.918 | 0.230 | 0.820 |
| 1.3.2 The ratio of TB control staff on duty during PHEs to those on duty before PHEs | 7.581 | 7.642 | -0.319 | 0.752 |
| 1.3.3 Number of TB doctors per 100,000 serviced population | 7.940 | 7.941 | -0.006 | 0.995 |
| 1.3.4 The ratio of TB doctors on duty during PHEs to those on duty before PHEs | 7.494 | 7.865 | -1.675 | 0.107 |
| 1.3.5 Number of TB laboratory personnel per 100,000 serviced population | 7.740 | 7.641 | 0.669 | 0.510 |
| 2.1.1 Timeliness of health-seeking for TB patients | 7.753 | 7.700 | 0.246 | 0.808 |
| 2.1.2 The referral proportion of TB patients or suspected TB patients reported by non-TB-designated hospital | 7.655 | 7.735 | -0.290 | 0.775 |
| 2.1.3 The proportion of patients who reached TB-designated hospital among those referred by non-TB-designated hospital | 7.780 | 7.933 | -0.959 | 0.348 |
| 2.1.4 The proportion of patients who reached TB-designated hospitals among those who have been traced | 7.903 | 7.880 | 0.114 | 0.910 |
| 2.1.5 The proportion of patients who undergo molecular biological testing upon their first to TB-designated hospital | 7.925 | 8.055 | -0.555 | 0.584 |
| 2.1.6 Timeliness of diagnosis for TB patients | 8.178 | 8.016 | 0.875 | 0.391 |
| 2.1.7 The proportion of drug resistance screening among bacteriologically positive TB patients | 7.919 | 8.062 | -0.596 | 0.557 |
| 2.2.1 The proportion of confirmed TB patients who are enrolled in anti-TB treatment | 8.418 | 8.556 | -0.739 | 0.467 |
| 2.2.2 Timeliness of treatment for confirmed TB patients | 8.164 | 8.053 | 0.501 | 0.621 |
| 2.2.3 The proportion of TB patients who undergo reexamination among those who have complete two months of treatment | 8.306 | 8.025 | 1.408 | 0.173 |
| 2.2.4 The proportion of TB patients who undergo reexamination within one month prior to the end of the treatment course | 8.107 | 7.835 | 1.225 | 0.233 |
| 2.2.5 The proportion of TB patients who undergo examination at the end of treatment course | 8.153 | 8.061 | 0.438 | 0.665 |
| 2.3.1 The proportion of TB patients under management in primary health care institutions | 7.785 | 7.686 | 0.378 | 0.709 |
| 2.3.2 The proportion of TB patient under standard management | 8.002 | 7.800 | 0.764 | 0.452 |
| 2.3.3 The proportion of TB patients managed by intelligent tools | 7.680 | 7.616 | 0.209 | 0.836 |
| 2.4.1 The proportion of TB patients who receiving nutritional/transportation support | 7.091 | 7.398 | -1.201 | 0.242 |
| 2.4.2 The proportion of TB patients who received at least one psychological support | 6.891 | 6.946 | -0.166 | 0.870 |
| 3.1.1 The proportion of patients contacted TB-designated hospital for TB appraisal to the serviced population | 7.638 | 7.507 | 0.435 | 0.668 |
| 3.1.2 The proportion of TB patients with positive bacteriological result | 7.969 | 7.941 | 0.163 | 0.872 |
| 3.1.3 The proportion of TB patients who discontinued treatment | 8.326 | 8.082 | 1.063 | 0.299 |
| 3.1.4 The proportion of TB patients taking drugs regularly during treatment | 7.890 | 7.800 | 0.358 | 0.724 |
| 3.2.1 Reported incidence of TB | 8.332 | 8.322 | 0.055 | 0.957 |
| 3.2.2 The proportion of TB patients with successful treatment | 8.229 | 8.234 | -0.038 | 0.970 |
| 3.2.3 Mortality of TB patients | 8.090 | 8.132 | -0.184 | 0.856 |
| 3.2.4 Satisfaction of TB patients | 7.435 | 7.374 | 0.161 | 0.873 |
| **Abbreviations**: TB, tuberculosis; PHEs, public health emergencies |  |  |  |  |
